# Supplementary material for: Dealing With Dependent Effect Sizes in MASEM
Source: Atypon-hosted journal article supplement (doi:10.1027/2151-2604/a000485), 2022-01-01
Supplement: 2151-2604_a000485_esm1.pdf [file 2151-2604_a000485_esm1.pdf]

**Electronic Supplementary Material for**

**Stolwijk, I., Jak, S., Eichelsheim, V., & Hoeve, M. (2022). Dealing With Dependent Effect Sizes in MASEM: A Comparison of Different Approaches Using Empirical Data. *Zeitschrift für Psychologie*. <https://doi.org/10.1027/2151-2604/a000485>**

**Appendix A: Studies Included in the Meta-Analysis****Table E1**

*Characteristics of the Studies Included in the Meta-analysis*

| Study                      | Sample | <i>N</i> | <i>M</i> <sub>age</sub> | %<br>boys | Sample<br>type | # effect<br>sizes |
|----------------------------|--------|----------|-------------------------|-----------|----------------|-------------------|
| Aaron & Dallaire (2010)    | 1      | 857      | 12.4                    | 52        | 2              | 2                 |
|                            | 2      | 670      | 14.4                    | 52        | 2              | 2                 |
| Adams (2001)               |        | 932      | 12.5                    | 50        | 1              | 3                 |
| Allen et al. (2005)        |        | 179      | 13                      | 47        | 1              | 2                 |
| Baldry & Farrington (2000) |        | 238      | 12.7                    | 53        | 1              | 1                 |
| Banyard et al. (2006)      |        | 980      | 14.5                    | 48        | 1              | 3                 |
| Barberet et al. (2004)     | 1      | 1,836    | 17.5                    | 100       | 1              | 1                 |
|                            | 2      | 1,855    | 17.5                    | 0         | 1              | 1                 |
| Barnow et al. (2005)       |        | 168      | 14.5                    | 48        | 1              | 4                 |
| Bean et al. (2006)         |        | 202      | 13.9                    | 54        | 2              | 2                 |
| Bowman et al. (2007)       | 1      | 54       | 16.5                    | 100       | 1              | 3                 |
|                            | 2      | 81       | 16.4                    | 0         | 1              | 3                 |
| Brauer (2011)              |        | 1,919    | 11                      | 50        | 1              | 4                 |
| Brenden et al. (2001)      |        | 516      | 17                      | 100       | 1              | 2                 |
| Burton et al. (1995)       |        | 263      | 16.4                    | 48        | 1              | 5                 |
| Byrnes et al. (2011)       | 1      | 415      | 13.3                    | 44        | 1              | 1                 |
|                            | 2      | 372      | 13.9                    | 44        | 1              | 1                 |
| Caldwell et al. (2006)     |        | 95       | 15.3                    | 100       | 2              | 2                 |
| Campbell (1987)            |        | 64       | 15.5                    | 0         | 1              | 1                 |
| Capaldi et al. (2003)      | 1      | 49       | 13.5                    | 100       | 2              | 1                 |
|                            | 2      | 49       | 15.5                    | 100       | 2              | 1                 |
| Cernkovich et al. (1987)   |        | 824      | 15.3                    | 49        | 1              | 7                 |

## Dealing With Dependent Effect Sizes in MASEM – ESM 1

|                             |   |       |      |     |   |    |
|-----------------------------|---|-------|------|-----|---|----|
| Chapple (2003)              |   | 926   | 15.9 | 49  | 1 | 3  |
| Chhangur et al. (2015)      | 1 | 308   | 17.4 | 47  | 1 | 1  |
|                             | 2 | 308   | 16.4 | 47  | 1 | 1  |
|                             | 3 | 308   | 14.4 | 47  | 1 | 1  |
|                             | 4 | 308   | 15.4 | 47  | 1 | 1  |
|                             | 5 | 308   | 13.4 | 47  | 1 | 1  |
| Chung & Steinberg (2006)    |   | 488   | 15.5 | 100 | 2 | 3  |
| Conrad (2015)               |   | 766   | 12   | 50  | 1 | 1  |
| Cook (2009)                 |   | 88    | 15.3 | 67  | 3 | 1  |
| Coughlin & Vuchinich (1996) |   | 194   | 17   | 100 | 2 | 3  |
| Crane (2010)                |   | 688   | 14.9 | 46  | 1 | 2  |
| Criss (2002)                |   | 412   | 17   | 49  | 1 | 29 |
| Crosswhite-Gamble (2006)    |   | 736   | 15   | 50  | 1 | 87 |
| Dawes (1976)                |   | 619   | 16   | 50  | 2 | 1  |
| De Kemp et al. (2004)       | 1 | 520   | 12,3 | 50  | 1 | 2  |
|                             | 2 | 520   | 12,9 | 51  | 1 | 2  |
|                             | 3 | 520   | 13,5 | 51  | 1 | 2  |
| De Vries et al. (2016)      |   | 102   | 15.5 | 70  | 2 | 3  |
| Deutsch et al. (2012)       | 1 | 5,973 | 15.9 | 50  | 1 | 1  |
|                             | 2 | 2,277 | 16.1 | 48  | 1 | 1  |
| Dishion et al. (2004)       | 1 | 142   | 9,5  | 100 | 2 | 1  |
|                             | 2 | 142   | 23,5 | 100 | 2 | 1  |
| Dishion et al. (1991)       |   | 206   | 10   | 100 | 3 | 2  |
| Dodge et al. (2008)         | 1 | 754   | 6    | 50  | 3 | 2  |
|                             | 2 | 754   | 10   | 50  | 3 | 4  |
| Eaton et al. (2009)         | 1 | 240   | 15.2 | 100 | 3 | 2  |
|                             | 2 | 335   | 15.2 | 0   | 3 | 2  |
| Edens et al. (2008)         |   | 76    | 15.6 | 100 | 2 | 1  |
| Estevez et al. (2005)       |   | 983   | 13.7 | 47  | 1 | 6  |
| Evans et al. (2012)         | 1 | 381   | 11   | 0   | 1 | 1  |
|                             | 2 | 323   | 11   | 100 | 1 | 1  |
|                             | 3 | 381   | 13   | 0   | 1 | 1  |
|                             | 4 | 323   | 13   | 100 | 1 | 1  |

## Dealing With Dependent Effect Sizes in MASEM – ESM 1

|                           |   |        |      |     |   |    |
|---------------------------|---|--------|------|-----|---|----|
| Farrington et al. (2001)  |   | 1,395  | NA   | 100 | 1 | 2  |
| Farrington et al. (2002)  |   | 421    | 17.8 | 100 | 2 | 1  |
| Farrington et al. (2015)  |   | 400    | 21   | 100 | 1 | 2  |
| Finkenauer et al. (2005)  |   | 1,355  | 12.3 | 52  | 1 | 5  |
| Flannery et al. (1999)    | 1 | 608    | 12.7 | 100 | 1 | 2  |
|                           | 2 | 562    | 12.7 | 0   | 1 | 2  |
| Fletcher et al. (2004)    | 1 | 2,568  | 15.9 | 46  | 1 | 5  |
|                           | 2 | 2,568  | 16.9 | 46  | 1 | 3  |
| Gainey et al. (1997)      |   | 101    | 11.4 | 57  | 2 | 2  |
| Gault-Sherman (2012)      | 1 | 12,505 | 14.8 | 50  | 1 | 7  |
|                           | 2 | 12,505 | 15.8 | 50  | 1 | 13 |
| Giever (1996)             |   | 422    | 15   | NA  | 1 | 1  |
| Gold et al. (2011)        |   | 112    | 15.6 | 80  | 2 | 1  |
| Gray-Ray & Ray (1990)     | 1 | 215    | 15   | 100 | 2 | 1  |
|                           | 2 | 78     | 15   | 100 | 2 | 1  |
| Griffin et al. (2000)     |   | 228    | 11.5 | 50  | 1 | 1  |
| Guimond et al. (2016)     | 1 | 163    | 13.5 | 48  | 1 | 2  |
|                           | 2 | 163    | 14.5 | 48  | 1 | 1  |
| Haapasalo (2000)          |   | 78     | NA   | 100 | 2 | 2  |
| Hair et al. (2008)        |   | 4,671  | 18   | 51  | 1 | 6  |
| Halgunseth et al. (2013)  |   | 324    | 14   | 50  | 1 | 1  |
| Harris et al. (2017)      | 1 | 2,775  | 15   | 50  | 1 | 2  |
|                           | 2 | 2,867  | 15   | 50  | 1 | 4  |
|                           | 3 | 2,706  | 15   | 51  | 1 | 6  |
|                           | 4 | 2,150  | 15   | 51  | 1 | 8  |
| Hay (2001)                |   | 197    | 15.4 | 52  | 1 | 2  |
| Hay (2003)                |   | 182    | 15.4 | 48  | 1 | 3  |
| Haynie (2003)             |   | 5,477  | 15.1 | 0   | 1 | 1  |
| Heaven (1994)             | 1 | 136    | 14   | 100 | 1 | 4  |
|                           | 2 | 146    | 14   | 0   | 1 | 4  |
| Heaven et al. (2004)      |   | 276    | 15.3 | 68  | 1 | 4  |
| Henneberger et al. (2013) |   | 364    | 15.8 | 68  | 1 | 1  |
| Henneberger et al. (2014) |   | 517    | 14   | 0   | 1 | 1  |

## Dealing With Dependent Effect Sizes in MASEM – ESM 1

|                           |   |       |      |     |   |    |
|---------------------------|---|-------|------|-----|---|----|
| Herman et al. (1997)      | 1 | 2,850 | 15.1 | 49  | 1 | 3  |
|                           | 2 | 2,850 | 16.1 | 49  | 1 | 3  |
| Herrenkohl et al. (2000)  | 1 | 703   | 18   | 51  | 1 | 1  |
|                           | 2 | 715   | 18   | 51  | 1 | 2  |
|                           | 3 | 720   | 18   | 51  | 1 | 2  |
| Herrington (2015)         |   | 213   | 94.4 | 2   | 1 | 1  |
| Hill & Atkinson (1988)    | 1 | 1,294 | 16   | 100 | 1 | 8  |
|                           | 2 | 1,374 | 16   | 0   | 1 | 8  |
| Hoeve et al. (2011)       | 1 | 330   | 17.2 | 50  | 1 | 4  |
|                           | 2 | 301   | 23   | 44  | 1 | 4  |
| Hoeve et al. (2007)       | 1 | 506   | 22.5 | 100 | 1 | 1  |
|                           | 2 | 394   | 23   | 100 | 1 | 1  |
| Intravia et al. (2012)    |   | 1,675 | 13.8 | 50  | 1 | 2  |
| Janssen et al. (2016)     | 1 | 580   | 13.9 | 52  | 1 | 2  |
|                           | 2 | 539   | 15.9 | 52  | 1 | 2  |
| Johnson (1987)            | 1 | 353   | 15.5 | 0   | 1 | 2  |
|                           | 2 | 357   | 15.5 | 100 | 1 | 2  |
|                           | 3 | 710   | 15.5 | 50  | 1 | 2  |
| Jones et al. (2000)       |   | 50    | 19.2 | 58  | 1 | 4  |
| Jug (2015)                |   | 264   | 17.2 | 41  | 1 | 4  |
| Juras (2004)              |   | 452   | 12.9 | 53  | 1 | 1  |
| Keijsers et al. (2010)    | 1 | 289   | 14   | 48  | 1 | 4  |
|                           | 2 | 289   | 15   | 48  | 1 | 8  |
| Keijsers et al. (2012)    |   | 497   | 13   | 57  | 2 | 2  |
| Kerr et al. (1999)        | 1 | 593   | 14   | 100 | 1 | 2  |
|                           | 2 | 593   | 14   | 0   | 1 | 2  |
| Kjellstrand & Eddy (2011) | 1 | 655   | 10.2 | 49  | 2 | 1  |
|                           | 2 | 655   | 13.9 | 49  | 2 | 1  |
|                           | 3 | 655   | 15.7 | 49  | 2 | 2  |
|                           | 4 | 655   | NA   | NA  | 2 | 4  |
| Krohn & Massey (1980)     |   | 2,053 | 15   | NA  | 1 | 2  |
| Krohn et al. (1992)       |   | 947   | 13.5 | 74  | 2 | 16 |
| Kupanoff (2002)           |   | 202   | 15.8 | 27  | 3 | 8  |

## Dealing With Dependent Effect Sizes in MASEM – ESM 1

|                              |   |        |      |     |   |    |
|------------------------------|---|--------|------|-----|---|----|
| Kwon & Wickrama (2014)       |   | 407    | 14.6 | 46  | 1 | 6  |
| Lahlah et al. (2013)         |   | 364    | 16.5 | 100 | 2 | 4  |
| Lahlah et al. (2014)         | 1 | 365    | 15.7 | 100 | 2 | 16 |
|                              | 2 | 112    | 16.1 | 100 | 2 | 16 |
| Laible et al. (2016)         |   | 987    | 15   | 50  | 1 | 1  |
| Larzelere & Patterson (1990) |   | 180    | 13   | 100 | 2 | 4  |
| Loukas et al. (2007)         | 1 | 216    | 12   | 100 | 2 | 2  |
|                              | 2 | 238    | 13.4 | 0   | 2 | 2  |
| Luo (2000)                   |   | 217    | 14.7 | 53  | 1 | 1  |
| Mak (1994)                   | 1 | 405    | 15.6 | 100 | 1 | 2  |
|                              | 2 | 387    | 15.6 | 0   | 1 | 2  |
| Manders et al. (2006)        |   | 140    | 14.4 | 49  | 1 | 2  |
| Mann et al. (2015)           |   | 470    | 15.6 | 52  | 1 | 1  |
| Mason (1996)                 | 1 | 148    | 13.4 | 36  | 1 | 2  |
|                              | 2 | 148    | 14.4 | 36  | 1 | 2  |
| Mathis (2013)                |   | 2,722  | 13.3 | 52  | 1 | 35 |
| McCord (1991)                |   | 232    | 18   | 100 | 1 | 1  |
| Mulvey et al. (2010)         |   | 1,119  | NA   | 100 | 2 | 4  |
| Murray et al. (2007)         |   | 15,117 | NA   | 51  | 1 | 1  |
| Nijhof et al. (2009)         |   | 577    | 12.5 | 80  | 2 | 1  |
| O'Connor & Dvorak (2001)     | 1 | 141    | 17.1 | 100 | 1 | 3  |
|                              | 2 | 261    | 17.1 | 0   | 1 | 3  |
| Park et al. (2010)           |   | 2,522  | 19   | 51  | 1 | 1  |
| Paschall et al. (2003)       | 1 | 2,117  | 15.6 | 100 | 1 | 3  |
|                              | 2 | 2,117  | 16.6 | 100 | 1 | 2  |
| Patouris et al. (2016)       |   | 199    | 16.4 | 49  | 1 | 2  |
| Patterson et al. (1985)      |   | 133    | 15.8 | 100 | 1 | 6  |
| Peterson (2002)              | 1 | 1,536  | 12.1 | 0   | 1 | 1  |
|                              | 2 | 1,536  | 12.1 | 0   | 1 | 1  |
| Pettit et al. (2001)         |   | 440    | 51   | 52  | 1 | 6  |
| Prinz et al. (2004)          |   | 599    | 7.9  | 51  | 1 | 2  |
| Rankin & Kern (1994)         |   | 1,395  | 14.4 | 52  | 1 | 8  |
| Ray et al. (2017)            |   | 1,216  | 16.3 | 100 | 2 | 2  |

## Dealing With Dependent Effect Sizes in MASEM – ESM 1

|                              |   |       |      |     |   |   |
|------------------------------|---|-------|------|-----|---|---|
| Roberts (2002)               |   | 424   | 20.3 | 45. | 3 | 2 |
| Samaniego & Gonzalez (1999)  |   | 214   | 13.5 | 43  | 1 | 3 |
| Sampson & Laub (1994)        |   | 1,000 | 14.7 | 100 | 3 | 4 |
| Scholte (1999)               |   | 115   | 21   | 75  | 2 | 3 |
| Simon et al. (2007)          | 1 | 673   | 10.5 | 46  | 1 | 6 |
|                              | 2 | 673   | 12.5 | 46  | 1 | 3 |
| Simons et al. (1989)         | 1 | 307   | 15   | 50  | 3 | 3 |
|                              | 2 | 307   | 16   | 50  | 3 | 3 |
| Skinner (2000)               |   | 109   | 15   | 45  | 1 | 6 |
| Spano et al. (2009)          | 1 | 1,544 | 15   | 51  | 2 | 4 |
|                              | 2 | 1,544 | 16   | 51  | 2 | 4 |
| Stewart et al. (2002)        | 1 | 407   | 13.5 | 46  | 1 | 1 |
|                              | 2 | 407   | 15.5 | 46  | 1 | 2 |
| Svensson et al. (2013)       |   | 843   | 14.5 | 55  | 1 | 1 |
| Tilton-Weaver (2014)         | 1 | 874   | 13.7 | 50  | 1 | 4 |
|                              | 2 | 874   | 14.7 | 50  | 1 | 9 |
| Torrente & Vazsonyi (2012)   |   | 653   | 17   | 43  | 1 | 4 |
| Unnever et al. (2006)        |   | 2,472 | 12.5 | 50  | 1 | 3 |
| Van der Graaff et al. (2012) | 1 | 323   | 14.3 | 49  | 1 | 2 |
|                              | 2 | 323   | 15.3 | 49  | 1 | 2 |
| Van Voorhis et al. (1988)    |   | 152   | 16.4 | 53  | 1 | 7 |
| Van Vugt et al. (2016)       |   | 462   | 7.46 | 100 | 1 | 3 |
| Vazsonyi & Flannery (1997)   | 1 | 743   | 12.8 | 50  | 1 | 3 |
|                              | 2 | 278   | 12,8 | 52  | 1 | 3 |
| Vazsonyi et al. (2008)       | 1 | 687   | 15.7 | 46  | 1 | 8 |
|                              | 2 | 1,812 | 16.5 | 49  | 1 | 8 |
| Vazsonyi et al. (2016)       | 1 | 239   | 14   | 53  | 1 | 3 |
|                              | 2 | 130   | 14.7 | 52  | 1 | 3 |
| Vega et al. (1993)           |   | 1,843 | 12.5 | NA  | 1 | 1 |
| Vitaro et al. (2000)         |   | 567   | 13.5 | 100 | 1 | 3 |
| Walker-Barnes & Mason (2001) |   | 300   | 14.6 | 55  | 1 | 3 |
| Walters (2014)               |   | 4,897 | 9    | 52  | 1 | 1 |
| Weintraub & Gold (1991)      |   | 1,300 | 14.5 | 50  | 1 | 2 |

## Dealing With Dependent Effect Sizes in MASEM – ESM 1

|                             |   |       |      |     |   |    |
|-----------------------------|---|-------|------|-----|---|----|
| Wells & Rankin (1988)       |   | 1,830 | 16   | 100 | 1 | 6  |
| Werner & Silbereisen (2003) | 1 | 120   | 14.6 | 100 | 1 | 2  |
|                             | 2 | 120   | 15.6 | 100 | 1 | 2  |
|                             | 3 | 128   | 14.6 | 0   | 1 | 2  |
|                             | 4 | 128   | 15.6 | 0   | 1 | 2  |
| Williams & Steinberg (2011) |   | 1,062 | 16.4 | 86  | 2 | 4  |
| Wissink et al. (2006)       | 1 | 83    | 14.4 | 47  | 1 | 1  |
|                             | 2 | 33    | 14.4 | 47  | 1 | 1  |
|                             | 3 | 106   | 14.4 | 47  | 1 | 1  |
|                             | 4 | 319   | 14.4 | 47  | 1 | 1  |
| Wolfe & Shoemaker (1999)    |   | 127   | 15.8 | 78  | 2 | 4  |
| Wolff & Crockett (2011)     | 1 | 7,748 | 14.9 | 50  | 1 | 2  |
|                             | 2 | 7,748 | 15.9 | 50  | 1 | 2  |
| Worthen (2011)              | 1 | 638   | 15.3 | 100 | 1 | 8  |
|                             | 2 | 678   | 15.3 | 0   | 1 | 8  |
|                             | 3 | 1316  | 15.3 | 48  | 1 | 8  |
| Wright & Cullen (2001)      |   | 1,526 | 17.5 | 48  | 2 | 13 |

---

*Note.*  $N$  = sample size based on the juveniles;  $M_{age}$  = mean age of the juveniles when child delinquency was measured; % boys = based on number of male children in the sample; Sample type: 1 = sample of individuals not at-risk for delinquent behaviour, 2 = sample of individuals at-risk for delinquent behaviour, 3 = other (e.g., combined samples of delinquents and non-delinquents); # effect sizes = number of effect sizes (i.e., correlation coefficients) that were included in the current study.

**Appendix B: Additional Results****Table E2***Pooled Correlation Matrices for all Variables per Approach of Dealing with Dependency*

|                                       | 1                          | 2                          | 3                          | 4    |
|---------------------------------------|----------------------------|----------------------------|----------------------------|------|
| <b>Approach: Ignoring Dependency</b>  |                            |                            |                            |      |
| 1. Parental Crime                     | –                          | .008                       | .012                       | .022 |
| 2. Support                            | -.051***<br>[-.067, -.034] | –                          | .015                       | .007 |
| 3. Behavioural Control                | -.055***<br>[-.078, -.032] | .185***<br>[.155, .214]    | –                          | .009 |
| 4. Child Delinquency                  | .169***<br>[.125, .212]    | -.157***<br>[-.171, -.144] | -.162***<br>[-.180, -.144] | –    |
| <b>Approach: Simple Aggregation</b>   |                            |                            |                            |      |
| 1. Parental Crime                     | –                          | .019                       | .030                       | .040 |
| 2. Support                            | -.087***<br>[-.124, -.050] | –                          | .050                       | .016 |
| 3. Behavioural Control                | -.059*<br>[-.118, -.001]   | .365***<br>[.267, .464]    | –                          | .018 |
| 4. Child Delinquency                  | .224***<br>[.146, .303]    | -.193***<br>[-.225, -.162] | -.208***<br>[-.244, -.173] | –    |
| <b>Approach: Weighted Aggregation</b> |                            |                            |                            |      |
| 1. Parental Crime                     | –                          | .033                       | .021                       | .039 |
| 2. Support                            | -.064+<br>[-.129, .001]    | –                          | .034                       | .013 |
| 3. Behavioural Control                | -.071***<br>[-.112, -.031] | .272***<br>[.206, .339]    | –                          | .015 |
| 4. Child Delinquency                  | .227***<br>[.151, .303]    | -.169***<br>[-.193, -.144] | -.186***<br>[-.216, -.156] | –    |
| <b>Approach: Elimination</b>          |                            |                            |                            |      |
| 1. Parental Crime                     | –                          | .021                       | .018                       | .034 |
| 2. Support                            | -.055**<br>[-.095, -.015]  | –                          | .034                       | .013 |
| 3. Behavioural Control                | -.074***<br>[-.109, -.039] | .273***<br>[.206, .341]    | –                          | .017 |
| 4. Child Delinquency                  | .170***<br>[.103, .236]    | -.180***<br>[-.206, -.155] | -.191***<br>[-.224, -.157] | –    |
| <b>WPL-approach</b>                   |                            |                            |                            |      |
| 1. Parental Crime                     | –                          | .037                       | .045                       | .027 |
| 2. Support                            | -.016<br>[-.089, .057]     | –                          | .015                       | .011 |
| 3. Behavioural Control                | -.028<br>[-.116, .061]     | .150***<br>[.121, .178]    | –                          | .012 |



## Dealing With Dependent Effect Sizes in MASEM – ESM 1

|                      |                     |                      |                      |   |
|----------------------|---------------------|----------------------|----------------------|---|
| 4. Child Delinquency | .190 <sup>***</sup> | -.162 <sup>***</sup> | -.163 <sup>***</sup> | – |
|                      | [.138, .243]        | [-.183, -.141]       | [-.187, -.140]       |   |

*Note.* The pooled correlation estimates including their 95% confidence intervals are presented

below the diagonal, the corresponding standard errors are presented above the diagonal.

<sup>+</sup>  $p < .10$ . \*  $p < .05$ . \*\*  $p < .01$ . \*\*\*  $p < .001$ .

Dealing With Dependent Effect Sizes in MASEM – ESM 1

**Table E3**

*Parameter Estimates of the Partial Mediation Model including their 95% CIs per Approach of Dealing with Dependency*

|                                         | Ignoring Dependency |                  | Simple Aggregation |                  | Weighted Aggregation |                  | Elimination   |                  | WPL-approach  |                  |
|-----------------------------------------|---------------------|------------------|--------------------|------------------|----------------------|------------------|---------------|------------------|---------------|------------------|
|                                         | $\beta$             | 95% CI           | $\beta$            | 95% CI           | $\beta$              | 95% CI           | $\beta$       | 95% CI           | $\beta$       | 95% CI           |
| Parental Crime – Support                | -0.051<br>***       | [-0.067, -0.034] | -0.087<br>***      | [-0.124, -0.050] | -0.064<br>+          | [-0.129, 0.001]  | -0.055<br>**  | [-0.095, -0.015] | -0.016        | [-0.045, 0.013]  |
| Parental Crime – Behavioural Control    | -0.055<br>***       | [-0.078, -0.032] | -0.059<br>*        | [-0.118, -0.001] | -0.071<br>***        | [-0.112, -0.031] | -0.074<br>*** | [-0.109, -0.039] | -0.028<br>*   | [-0.049, -0.006] |
| Parental Crime – Child Delinquency      | 0.155<br>***        | [0.111, 0.199]   | 0.205<br>***       | [0.125, 0.285]   | 0.209<br>***         | [0.132, 0.286]   | 0.152<br>***  | [0.085, 0.219]   | 0.184<br>***  | [0.158, 0.210]   |
| Support – Child Delinquency             | -0.125<br>***       | [-0.140, -0.110] | -0.120<br>***      | [-0.163, -0.077] | -0.117<br>***        | [-0.150, -0.084] | -0.133<br>*** | [-0.164, -0.102] | -0.138<br>**  | [-0.230, -0.047] |
| Behavioural Control – Child Delinquency | -0.130<br>***       | [-0.150, -0.111] | -0.152<br>***      | [-0.198, -0.107] | -0.139<br>***        | [-0.175, -0.103] | -0.143<br>*** | [-0.181, -0.105] | -0.138<br>*** | [-0.193, -0.082] |

*Note.*  $\beta$  = regression coefficient; CI = confidence interval.

+  $p < .10$ . \*  $p < .05$ . \*\*  $p < .01$ . \*\*\*  $p < .001$ .

**Table E4***Residual (co)Variances of the Partial Mediation Model including their 95% CIs per Approach of Dealing with Dependence*

|                                  | Ignoring Dependency  |              | Simple Aggregation |             | Weighted Aggregation |             | Elimination |             | WPL-approach |              |
|----------------------------------|----------------------|--------------|--------------------|-------------|----------------------|-------------|-------------|-------------|--------------|--------------|
|                                  | Residual Variances   |              |                    |             |                      |             |             |             |              |              |
|                                  | $\psi$               | 95% CI       | $\psi$             | 95% CI      | $\psi$               | 95% CI      | $\psi$      | 95% CI      | $\psi$       | 95% CI       |
| Support                          | 1.00                 | [1.00, 1.00] | .99                | [.99, 1.00] | 1.00                 | [.99, 1.00] | 1.00        | [.99, 1.00] | 1.00         | [1.00, 1.00] |
| Behavioural Control              | 1.00                 | [.99, 1.00]  | 1.00               | [.99, 1.00] | 1.00                 | [.99, 1.00] | .99         | [.99, 1.00] | 1.00         | [1.00, 1.00] |
| Child Delinquency                | .93                  | [.92, .95]   | .90                | [.86, .93]  | .91                  | [.88, .94]  | .92         | [.90, .95]  | .92          | [.89, .95]   |
|                                  | Residual Covariances |              |                    |             |                      |             |             |             |              |              |
| Support –<br>Behavioural Control | .18                  | [.15, .21]   | .36                | [.26, .46]  | .27                  | [.21, .33]  | .27         | [.20, .34]  | .15          | [.08, .22]   |

*Note.*  $\psi$  = residual (co)variance; CI = confidence interval.

**Appendix C: Evaluation of Publication Bias**

**Figure E1**

*Funnel Plot of All Effect Sizes*

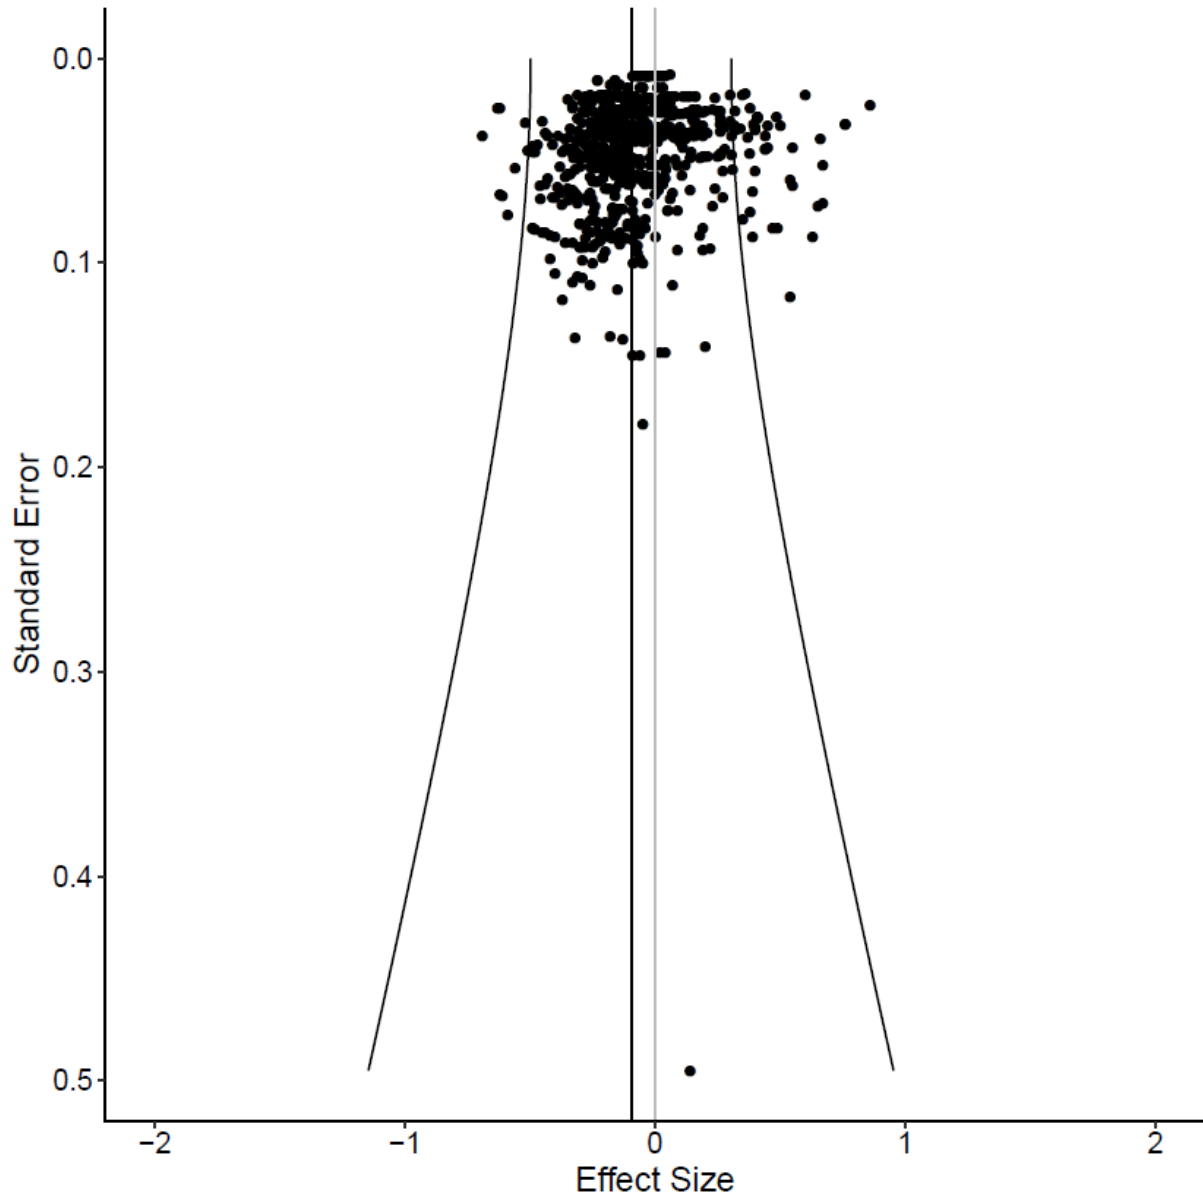

*Note.* Each dot represents one effect size.

**Figure E2**

*Study-Funnel Plot*

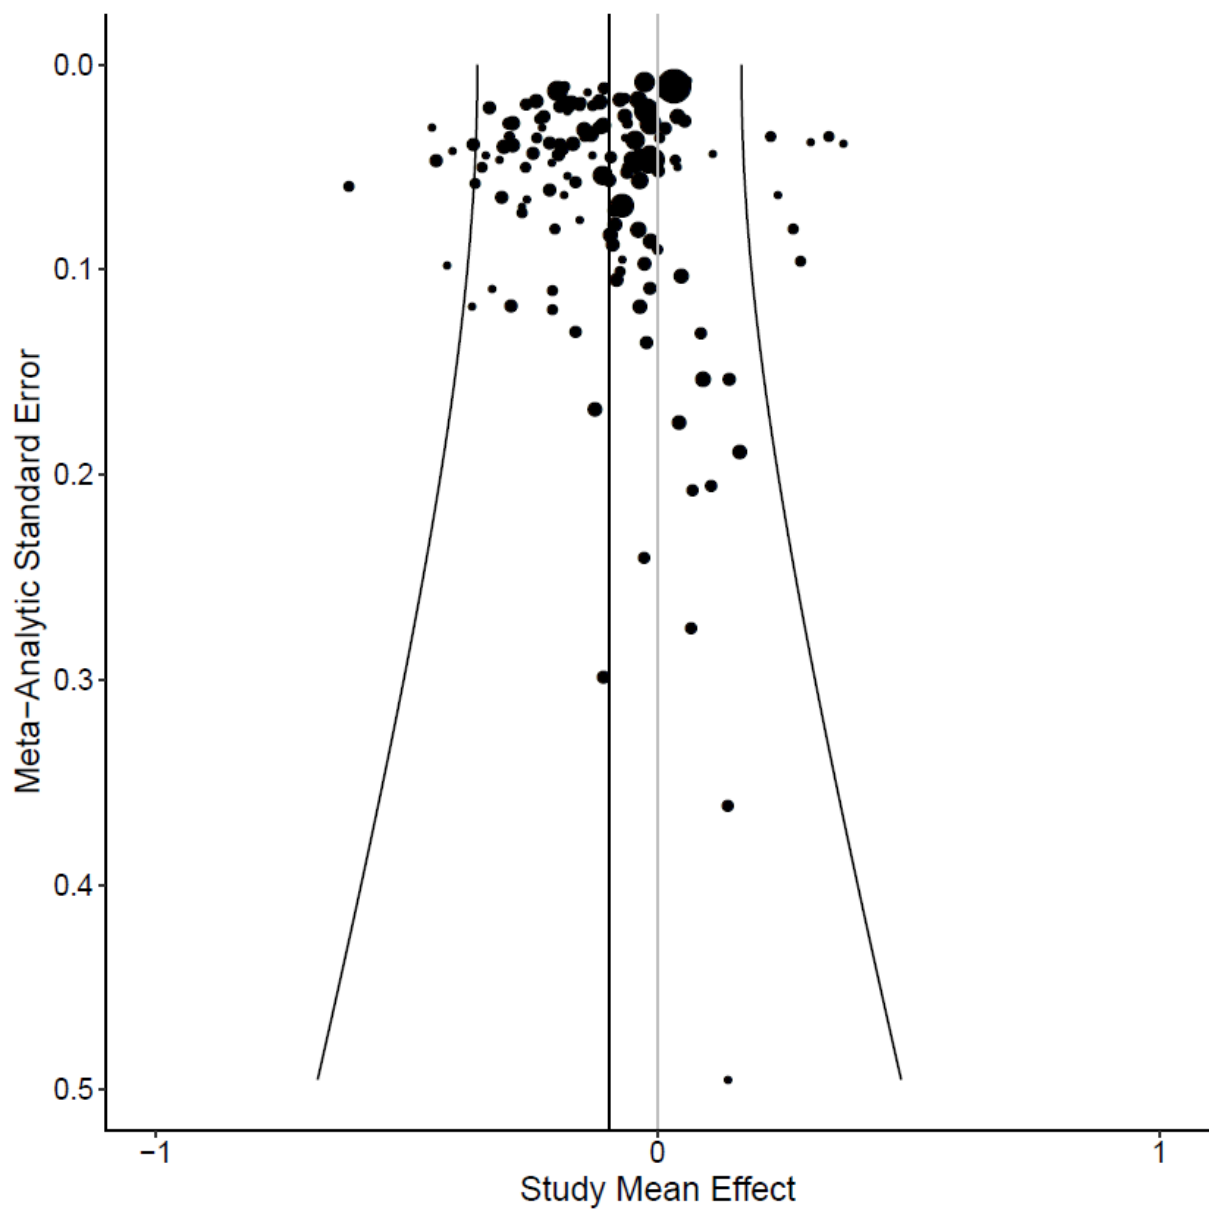

*Note.* Each dot represents a study. The size of the dots is proportional to the number of effect sizes reported in the study.

## **Appendix D: PRISMA Statement**

The data was collected by Hoeve et al. (2009), Silva Pinho (2017), and Van den Berg (2018). Four databases were searched, including: PsycINFO, ERIC, Sociological Abstracts, and Criminal Justice Abstracts. The following script was written for PsycINFO and adjusted for the other databases.

### **#1 parenting**

parental involvement/ OR parenting style/ OR parenting skills/ OR transgenerational patterns/ OR (parenting OR child?rearing OR parent\* influenc\* OR parent\* style\* OR ((parent\* OR mother\* OR maternal OR father\* OR paternal) ADJ3 (acceptance OR authorita\* OR control\* OR discipline OR disclosure OR harsh OR knowledge OR monitoring OR neglect OR permissive\* OR rejection OR supervision OR support OR warmth)) OR intergeneration\* OR second generation\* OR transgenerat\*).ti,ab,id.

### **#2 child delinquency**

juvenile delinquency/ OR juvenile justice/ OR ((child\* OR adolesc\* OR youth\* OR juvenile) ADJ3 (delinq\* OR devian\* OR crim\* OR offend\*)).ti,ab,id.

### **#3 parental delinquency**

((parent\* OR mother\* OR maternal OR father\* OR paternal) ADJ3 (delinq\* OR devian\* OR crim\* OR offend\*)).ti,ab,id.

### **Combination of search scripts**

(1 AND 2) OR (1 AND 3) OR (2 AND 3)

**Figure E3**

*PRISMA flow diagram for the selection of studies for the project ‘The potential mediating role of parenting on the intergenerational continuity of criminal behaviour’.*

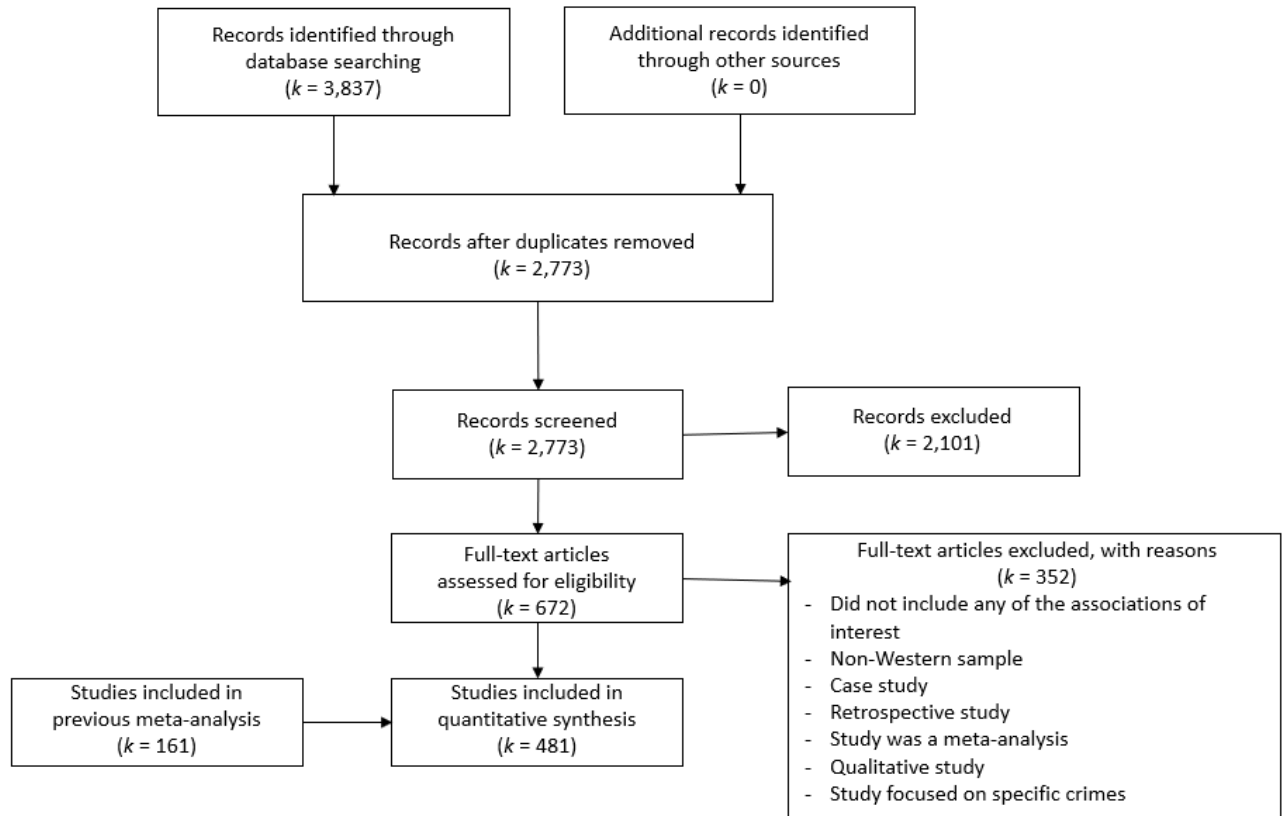

*Note.* Derived from “A Comparison of Meta-analytic Structural Equation Modeling and Univariate Meta-analysis: An application in forensic child and youth care services [Unpublished master’s thesis]”, by T. van den Berg, 2019.
